# Supplementary material for: Epigenome-wide meta-analysis identifies DNA methylation biomarkers associated with diabetic kidney disease
Source: PubMed Central journal article supplement (PMC9780337; doi:10.1038/s41467-022-34963-6), 2022-12-22

# Epigenome-wide meta-analysis identifies DNA methylation biomarkers associated with diabetic kidney disease

Laura J Smyth<sup>1\*</sup>, Emma H Dahlström<sup>2,3,4\*</sup>, Anna Syreeni<sup>2,3,4</sup>, Katie Kerr<sup>1</sup>, Jill Kilner<sup>1</sup>, Ross Doyle<sup>5</sup>, Eoin Brennan<sup>5</sup>, Viji Nair<sup>6</sup>, Damian Fermin<sup>7</sup>, Robert G Nelson<sup>8</sup>, Helen C Looker<sup>8</sup>, Christopher Wooster<sup>1</sup>, Darrell Andrews<sup>5</sup>, Kerry Anderson<sup>1</sup>, Gareth J McKay<sup>1</sup>, Joanne B Cole<sup>9,10,11</sup>, Rany M Salem<sup>12</sup>, Peter J Conlon<sup>13</sup>, Matthias Kretzler<sup>14</sup>, Joel N Hirschhorn<sup>9,10,15</sup>, Denise Sadlier<sup>16</sup>, Catherine Godson<sup>5</sup>, Jose C Florez<sup>9,11,17</sup>, Carol Forsblom<sup>2,3,4</sup>, Alexander P Maxwell<sup>1,18</sup>, Per-Henrik Groop<sup>2,3,4,19</sup>, Niina Sandholm<sup>2,3,4</sup>, Amy Jayne McKnight<sup>1</sup> on behalf of the GENIE consortium

\*These authors contributed equally

## Supplementary Tables

|                                                                                                                                          |    |
|------------------------------------------------------------------------------------------------------------------------------------------|----|
| Supplementary Table 1 Summary of the population cohort characteristics and missing data per variable.....                                | 2  |
| Supplementary Table 2 Details of samples and CpGs retained in each analysis model during RnBeads QC.....                                 | 3  |
| Supplementary Table 3 Look-ups of DKD-associated CpGs ( $p < 9.9 \times 10^{-8}$ ) in EWAS on DKD in the CRIC study .....                | 4  |
| Supplementary Table 4 eFORGE-TF results ( $p < 10^{-5}$ ) for motif overlap with DKD-associated differentially methylated CpG sites..... | 5  |
| Supplementary Table 5 Differential kidney gene expression for DKD in the NephroSeq database v4 .....                                     | 6  |
| Supplementary Table 6 Differential kidney gene expression in the North Dublin Renal Biobank RNA-Seq data.....                            | 7  |
| Supplementary Table 7 Kidney gene expression correlations in American Indian T2D population with DKD (n=97) .....                        | 8  |
| Supplementary Table 8 Mendelian randomisation results for the association between methylation at DKD-associated CpGs and DKD .....       | 9  |
| Supplementary Table 9 Differentially methylated genes derived from METAL analysis from three models .....                                | 9  |
| Supplementary Table 10 Genetics of Nephropathy – an International Effort (GENIE) members .....                                           | 10 |

## Supplementary Figures

|                                                                                                                              |    |
|------------------------------------------------------------------------------------------------------------------------------|----|
| Supplementary Figure 1 Representative concordance plots for a duplicate sample pair.....                                     | 13 |
| Supplementary Figure 2 Flow chart depicting the methods undertaken.....                                                      | 13 |
| Supplementary Figure 3 Regional association plots (A-G) for the seven CpGs EWAS-significant in each meta-analysis model..... | 13 |
| Supplementary Figure 4 Regional association plots for the DKD-associated CpG located within the <i>REV1</i> gene .....       | 18 |

## Supplementary Tables

**Supplementary Table 1 Summary of the population cohort characteristics and missing data per variable**

| Demographics                        | UK-ROI ( <i>n</i> =504) | <i>n</i> (%) | FinnDiane ( <i>n</i> =800) | <i>n</i> (%) |
|-------------------------------------|-------------------------|--------------|----------------------------|--------------|
| Sex, Male (%)                       | 264 (52.4)              | 504 (100)    | 300 (37.5)                 | 800 (100)    |
| Age, years (SD)                     | 41.6 (9.52)             | 504 (100)    | 43.4 (10.9)                | 800 (100)    |
| Diabetes onset age, years (SD)      | 15.2 (7.3)              | 458 (90.9)   | 13.7 (8.4)                 | 800 (100)    |
| Diabetes duration, years (SD)       | 26.8 (7.38)             | 458 (90.9)   | 29.7 (9.2)                 | 800 (100)    |
| CD8+ T-cells, % (SD)                | 4.1 (4.3)               | 504 (100)    | 5.2 (4.4)                  | 800 (100)    |
| CD4+ T-cells, % (SD)                | 13.4 (6.4)              | 504 (100)    | 10.6 (4.9)                 | 800 (100)    |
| Natural killer cells, %             | 3.6 (4.5)               | 504 (100)    | 3.7 (4.6)                  | 800 (100)    |
| B-cells, %                          | 3.2 (2.5)               | 504 (100)    | 3.5 (2.7)                  | 800 (100)    |
| Monocytes, %                        | 8.2 (3.7)               | 504 (100)    | 7.7 (2.9)                  | 800 (100)    |
| Granulocytes, %                     | 64.6 (11.4)             | 504 (100)    | 65.3 (9.1)                 | 800 (100)    |
| Smoking status, current (%)         | 89 (23.6)               | 377 (74.8)   | 203 (25.4)                 | 800 (100)    |
| HbA <sub>1c</sub> , percentage (SD) | 8.7 (1.9)               | 431 (85.5)   | 8.5 (1.5)                  | 789 (98.6)   |
| BMI, kg/m <sup>2</sup> (SD)         | 27.8 (7.3)              | 290 (57.5)   | 26.0 (4.0)                 | 797 (99.6)   |
| HDL cholesterol, mmol/mol (SD)      | 1.6 (0.5)               | 204 (40.5)   | 1.3 (0.4)                  | 794 (99.3)   |
| Triglycerides, mmol/mol (SD)        | 1.6 (1.5)               | 249 (49.4)   | 1.4 (1.0)                  | 799 (99.9)   |

Continuous variables are reported as mean (standard deviation), and categorical variables are reported as number (%). Abbreviations: BMI=body mass index, FinnDiane=Finnish Diabetic Nephropathy study, HbA<sub>1c</sub>=glycated haemoglobin, HDL=high-density lipoprotein, *n*=number, ROI=Republic of Ireland, SD=standard deviation, UK=United Kingdom

**Supplementary Table 2 Details of samples and CpGs retained in each analysis model during RnBeads QC**

| <b>Model</b>                                                          | <b>Variables adjusted for</b>                                                                                    | <b>Cohort</b> | <b>Pre RnBeads-QC and preprocessing stages</b> |                                  | <b>Post RnBeads-QC and preprocessing stages</b> |                                |
|-----------------------------------------------------------------------|------------------------------------------------------------------------------------------------------------------|---------------|------------------------------------------------|----------------------------------|-------------------------------------------------|--------------------------------|
|                                                                       |                                                                                                                  |               | <b>Initial sample (n included) *</b>           | <b>Initial CpGs (n included)</b> | <b>Final sample (n retained)</b>                | <b>Final CpGs (n retained)</b> |
| Minimal model ( <i>n</i> =1,302 after QC)                             | Age, sex and six WCCs                                                                                            | UK-ROI        | 504                                            | 866 895                          | 497                                             | 764 643                        |
|                                                                       |                                                                                                                  | FinnDiane     | 798                                            | 866 895                          | 797                                             | 763 064                        |
| Minimal Model plus current smoking status ( <i>n</i> =1,175 after QC) | Age, sex, six WCCs and current smoking status                                                                    | UK-ROI        | 377                                            | 866 895                          | 372                                             | 768 287                        |
|                                                                       |                                                                                                                  | FinnDiane     | 798                                            | 866 895                          | 797                                             | 763 064                        |
| Maximal model ( <i>n</i> =957 after QC)                               | Age, sex, six WCCs, current smoking status, HbA <sub>1c</sub> , HDL, triglycerides, duration of diabetes and BMI | UK-ROI        | 159                                            | 866 895                          | 156                                             | 776 504                        |
|                                                                       |                                                                                                                  | FinnDiane     | 798                                            | 866 895                          | 797                                             | 763 064                        |

\*after initial sex checks and removal of individuals with missing covariates. Abbreviations: BMI=body mass index, FinnDiane=Finnish Diabetic Nephropathy study, HbA<sub>1c</sub>=glycated haemoglobin, HDL=high-density lipoprotein, *n*=number, QC=Quality control, ROI=Republic of Ireland, UK=United Kingdom

Supplementary Table 3 Look-ups of DKD-associated CpGs ( $p < 9.9 \times 10^{-8}$ ) in EWAS on DKD in the CRIC study

| CpG        | Gene                         | HbA <sub>1c</sub> $p$ | $p_{adj}$ | Albuminuria $p$ | $p_{adj}$ | eGFR $p$   | $p_{adj}$  | eGFR slope $p$ | $p_{adj}$ |
|------------|------------------------------|-----------------------|-----------|-----------------|-----------|------------|------------|----------------|-----------|
| cg10072464 | <i>ADPRHL1</i>               | 0.075                 | 1         | 0.193           | 1         | 0.002      | 0.256      | 0.216          | 1         |
| cg22815707 | <i>ANKRD12</i>               | 0.950                 | 1         | 0.295           | 1         | 0.401      | 1          | 0.59           | 1         |
| cg12378834 | <i>C5orf66</i>               | 0.376                 | 1         | 0.883           | 1         | 0.99       | 1          | 0.852          | 1         |
| cg05325763 | <i>CPT1A</i>                 | 0.959                 | 1         | 0.112           | 1         | 0.747      | 1          | 0.291          | 1         |
| cg17058475 | <i>CPT1A</i>                 | 0.315                 | 1         | 0.009           | 1         | 0.702      | 1          | 0.366          | 1         |
| cg03546163 | <i>FKBP5</i>                 | 3.00E-03              | 0.384     | 0.891           | 1         | 0.151      | 1          | 0.21           | 1         |
| cg05284887 | <i>GJA5</i>                  | 0.668                 | 1         | 0.77            | 1         | 0.355      | 1          | 0.603          | 1         |
| cg13125822 | <i>GRK5</i>                  | 0.274                 | 1         | 0.532           | 1         | 0.737      | 1          | 0.97           | 1         |
| cg18376497 | <i>INPP4B</i>                | 0.604                 | 1         | 0.493           | 1         | 0.005      | 0.64       | 0.387          | 1         |
| cg02841972 | <i>GRHL1, KLF11</i>          | 0.849                 | 1         | 0.105           | 1         | 0.663      | 1          | 0.264          | 1         |
| cg19996939 | <i>HBS1L, MYB</i>            | 0.141                 | 1         | 0.446           | 1         | 0.174      | 1          | 0.931          | 1         |
| cg01895164 | <i>PAFAH2, EXTL1</i>         | 0.654                 | 1         | 0.863           | 1         | 0.308      | 1          | 0.837          | 1         |
| cg12230203 | <i>PTGIS, B4GALT5</i>        | NA                    | NA        | NA              | NA        | NA         | NA         | NA             | NA        |
| cg25544931 | <i>ZNF763, ZNF433-AS1</i>    | 0.698                 | 1         | 0.793           | 1         | 2.09E-05   | 2.68E-03   | 0.082          | 1         |
| cg17944885 | <i>ZNF788P, ZNF625-ZNF20</i> | 0.756                 | 1         | 0.034           | 1         | 3.72E-13   | 4.76E-11   | 0.894          | 1         |
| cg05165263 | <i>IRF2</i>                  | 0.232                 | 1         | 0.659           | 1         | 6.62E-05   | 8.47E-03   | 0.788          | 1         |
| cg05710777 | <i>LINC01800</i>             | 0.601                 | 1         | 0.093           | 1         | 0.991      | 1          | 0.762          | 1         |
| cg12864625 | <i>MBNL1</i>                 | 0.363                 | 1         | 0.709           | 1         | 0.71       | 1          | 0.144          | 1         |
| cg03026982 | <i>NAV2</i>                  | 0.228                 | 1         | 0.667           | 1         | 0.39       | 1          | 0.558          | 1         |
| cg10473623 | <i>NAV2</i>                  | 0.670                 | 1         | 0.839           | 1         | 0.749      | 1          | 0.431          | 1         |
| cg08150816 | <i>NME7</i>                  | NA                    | NA        | NA              | NA        | NA         | NA         | NA             | NA        |
| cg06587767 | <i>PIP5K1C</i>               | 0.903                 | 1         | 0.947           | 1         | 0.283      | 1          | 0.455          | 1         |
| cg24382141 | <i>PSKH1</i>                 | 0.022                 | 1         | 0.02            | 1         | 0.002      | 0.256      | 0.448          | 1         |
| cg15167811 | <i>PTBP3</i>                 | 0.766                 | 1         | 0.922           | 1         | 0.684      | 1          | 0.574          | 1         |
| cg00008629 | <i>PTBP3</i>                 | 0.678                 | 1         | 0.187           | 1         | 0.239      | 1          | 0.437          | 1         |
| cg23527387 | <i>REV1</i>                  | 0.400                 | 1         | 0.667           | 1         | 0.26       | 1          | 0.252          | 1         |
| cg02711608 | <i>SLC1A5</i>                | NA                    | NA        | NA              | NA        | NA         | NA         | NA             | NA        |
| cg21961721 | <i>SLC27A3</i>               | 0.400                 | 1         | 0.613           | 1         | <2.20E-308 | <2.20E-308 | 0.221          | 1         |
| cg08230697 | <i>STAB2</i>                 | 0.115                 | 1         | 0.808           | 1         | 0.208      | 1          | 0.245          | 1         |
| cg02917536 | <i>TAB2</i>                  | 0.558                 | 1         | 0.327           | 1         | 0.018      | 1          | 0.497          | 1         |
| cg19693031 | <i>TXNIP</i>                 | 6.22E-14              | 7.96E-12  | 0.055           | 1         | 0.752      | 1          | 0.132          | 1         |
| cg11414254 | <i>ZNF346</i>                | 0.903                 | 1         | 0.662           | 1         | 0.38       | 1          | 0.582          | 1         |

$P_{adj}$  is the  $p$ -value adjusted for the number of lookups (32 CpGs  $\times$  four phenotypes). CRIC=Chronic Renal Insufficiency Cohort, eGFR=estimated glomerular filtration rate. HbA<sub>1c</sub>=glycated haemoglobin

**Supplementary Table 4 eFORGE-TF results ( $p < 10^{-5}$ ) for motif overlap with DKD-associated differentially methylated CpG sites.**

| CpG        | Gene                              | TF id                       | TF name                                                  | Database      | CHR                          | FIMO (p) |
|------------|-----------------------------------|-----------------------------|----------------------------------------------------------|---------------|------------------------------|----------|
| cg22815707 | <i>ANKRD12</i>                    | HOMEZ_HOMEZ_1               | Homeobox and leucine zipper protein Homez (HOMEZ)        | Taipale/SELEX | chr18:9138599-9138611: -     | 6.30E-06 |
| cg17058475 | <i>CPT1A</i>                      | V_PPARG_02                  | Peroxisome proliferator-activated receptor gamma (PPARG) | TRANSFAC      | chr11:68607722-68607745: +   | 9.52E-06 |
| cg05165263 | <i>IRF2</i>                       | V_PAX3_01                   | Paired box protein Pax-3 (PAX3)                          | TRANSFAC      | chr4:185317216-185317229: -  | 5.42E-06 |
| cg05710777 | <i>LINC01800</i>                  | Tcfap2a_secondary           | Transcription factor AP-2-alpha (TFAP2A)                 | UniProbe      | chr2:65089812-65089826: -    | 3.58E-06 |
| cg01895164 | <i>Intergenic (PAFAH2, EXTL1)</i> | V_P53_04                    | Cellular tumor antigen p53 (P53)                         | TRANSFAC      | chr1:26332143-26332163: +    | 1.08E-06 |
|            |                                   | V_CMYB_Q5                   | Transcriptional activator Myb (MYB)                      | TRANSFAC      | chr1:26332144-26332155: -    | 5.33E-06 |
|            |                                   | V_P53_04                    | Cellular tumor antigen p53 (P53)                         | TRANSFAC      | chr1:26332143-26332163: -    | 5.47E-06 |
|            |                                   | V_P53_01                    | Cellular tumor antigen p53 (P53)                         | TRANSFAC      | chr1:26332143-26332163: +    | 7.71E-06 |
| cg10072464 | <i>Intergenic (GRHL1, KLF11)</i>  | VDR_nuclearreceptor_1       | Vitamin D3 receptor (VDR)                                | Taipale/SELEX | chr13:114064535-114064551: + | 2.44E-07 |
|            |                                   | Vdr.mouse_nuclearreceptor_1 | Vitamin D3 receptor (VDR)                                | Taipale/SELEX | chr13:114064535-114064551: + | 4.89E-07 |
|            |                                   | V_DR3_Q4                    | Vitamin D3 receptor (VDR)                                | TRANSFAC      | chr13:114064519-114064540: + | 3.09E-06 |
| cg19996939 |                                   | V_SREBP_Q6                  | Sterol regulatory element-binding proteins (SREBPs)      | TRANSFAC      | chr6:135466478-135466493: -  | 2.92E-06 |
|            |                                   | V_SREBP1_Q5                 | Sterol regulatory element-binding proteins (SREBPs)      | TRANSFAC      | chr6:135466478-135466493: -  | 5.38E-06 |

Data from 850k array and fKidney samples, 7 experiments. Abbreviations: CHR=Chromosome, FIMO=Find Individual Motif Occurrences, TF=Transcription factor, TRANSFAC=TRANScription FACTor database

Supplementary Table 5 Differential kidney gene expression for DKD in the NephroSeq database v4

| Dataset name   | ERCB Nephrotic Syndrome Tublnt | Ju CKD Glom                                   | Ju CKD Glom                                 | Ju CKD Tublnt                                | Schmid Diabetes Tublnt                       | Schmid Diabetes Tublnt        | Woroniacka Diabetes Glom                     | Woroniacka Diabetes Tublnt                   |
|----------------|--------------------------------|-----------------------------------------------|---------------------------------------------|----------------------------------------------|----------------------------------------------|-------------------------------|----------------------------------------------|----------------------------------------------|
| Group:         | DKD vs. Healthy LD             | DKD vs. Healthy LD                            | DKD vs. Other Diseases                      | DKD vs. Healthy LD                           | DKD vs. MCD                                  | DKD vs. MCD and Control       | DN vs. Healthy LD                            | DN vs. Healthy LD                            |
| <i>ANKRD12</i> |                                |                                               |                                             |                                              |                                              |                               | FC = -1.602<br>( $p = 0.003$ )               |                                              |
| <i>FKBP5</i>   | FC = -3.303<br>( $p = 0.001$ ) | FC = -3.233<br>( $p = 5.76 \times 10^{-10}$ ) | FC = -1.64<br>( $p = 6.55 \times 10^{-5}$ ) | FC = -3.272<br>( $p = 4.06 \times 10^{-8}$ ) | FC = -2.176<br>( $p = 1.21 \times 10^{-4}$ ) |                               |                                              | FC = -1.534<br>( $p = 7.00 \times 10^{-4}$ ) |
| <i>GRK5</i>    |                                |                                               |                                             |                                              |                                              |                               | FC = -4.343<br>( $p = 9.49 \times 10^{-7}$ ) | FC = 1.566<br>( $p = 0.026$ )                |
| <i>INPP4B</i>  |                                |                                               |                                             |                                              |                                              |                               |                                              | FC = 1.514<br>( $p = 0.012$ )                |
| <i>MBNL1</i>   |                                |                                               |                                             |                                              |                                              |                               |                                              | FC = 1.620<br>( $p = 0.005$ )                |
| <i>NME7</i>    |                                |                                               |                                             |                                              |                                              |                               | FC = -2.485<br>( $p = 5.51 \times 10^{-4}$ ) |                                              |
| <i>PTBP3</i>   |                                |                                               |                                             |                                              |                                              |                               |                                              | FC = 2.587<br>( $p = 1.20 \times 10^{-5}$ )  |
| <i>REV1</i>    |                                |                                               |                                             |                                              |                                              |                               | FC = -1.604<br>$p = 2.90 \times 10^{-4}$     |                                              |
| <i>SLC27A3</i> |                                | FC = 1.565<br>( $p = 6.61 \times 10^{-5}$ )   |                                             |                                              |                                              |                               |                                              |                                              |
| <i>TXNIP</i>   |                                |                                               |                                             |                                              | FC = 1.665<br>( $p = 0.009$ )                | FC = 1.598<br>( $p = 0.004$ ) | FC = -1.503<br>( $p = 1.84 \times 10^{-4}$ ) | FC = 3.137<br>( $p = 4.67 \times 10^{-4}$ )  |

Results searched for for genes containing DKD-associated CpGs. Only those population groups which assessed DKD are included. Any genes with no results have been removed from this table. Abbreviations: CKD=Chronic Kidney Disease, DKD=Diabetic kidney disease, DN=Diabetic nephropathy, ERCB=European Renal cDNA Bank, Glom=Glomeruli, LD=Living Donor, MCD=Minimal Change Disease, Tublnt=Tubulointerstitium

**Supplementary Table 6 Differential kidney gene expression in the North Dublin Renal Biobank RNA-Seq data**

| <b>Gene</b>    | <b>p-value</b> | <b>Adj p-value</b> | <b>Log<sub>2</sub> Ratio</b> | <b>Analysis</b> | <b>Comparison</b>                                | <b>Participants</b>         |
|----------------|----------------|--------------------|------------------------------|-----------------|--------------------------------------------------|-----------------------------|
| <i>C5orf66</i> | 0.002          | 0.028              | 0.362                        | DE              | CRP, median value as threshold                   | n=39, native and transplant |
| <i>GJA5</i>    | 5.47E-05       | 0.011              | -0.795                       | DE              | eGFR, median value as threshold                  | n=39, native and transplant |
| <i>GJA5</i>    | 0.007          | 0.041              | -0.68                        | DE              | Fibrosis, median value as threshold              | n=39, native and transplant |
| <i>GJA5</i>    | 5.48E-05       | 0.011              | -0.795                       | DE              | eGFR, median value as threshold                  | n=24, native kidney only    |
| <i>INPP4B</i>  | 0.0003         | 0.037              | -0.581                       | DE              | eGFR, median value as threshold                  | n=44, native and transplant |
| <i>INPP4B</i>  | 0.008          | 0.043              | 0.483                        | DE              | Fibrosis, median value as threshold              | n=39, native and transplant |
| <i>INPP4B</i>  | 0.003          | 0.037              | 0.712                        | DE              | Fibrosis, median value as threshold              | n=24, native kidney only    |
| <i>IRF2</i>    | 0.001          | 0.027              | 0.298                        | DE              | Fibrosis, median value as threshold              | n=24, native kidney only    |
| <i>MBNL1</i>   | 0.003          | 0.022              | 0.452                        | DE              | Fibrosis, median value as threshold              | n=39, native and transplant |
| <i>MBNL1</i>   | 0.007          | 0.035              | 0.417                        | DE              | Progression to kidney failure vs. no progression | n=44, native and transplant |
| <i>MBNL1</i>   | 0.0004         | 0.022              | 0.531                        | DE              | Fibrosis, median value as threshold              | n=24, native kidney only    |
| <i>NAV2</i>    | 1.02E-06       | 0.001              | -0.31                        | DE              | CRP, median value as threshold                   | n=39, native and transplant |
| <i>PSKH1</i>   | 0.006          | 0.034              | 0.408                        | Correlation     | Log eGFR at baseline                             | n=44, native and transplant |
| <i>PTBP3</i>   | 0.003          | 0.022              | 0.492                        | DE              | Fibrosis, median value as threshold              | n=39, native and transplant |
| <i>PTBP3</i>   | 0.003          | 0.026              | -0.581                       | Correlation     | Log eGFR at baseline                             | n=24, native kidney only    |
| <i>SLC1A5</i>  | 0.0002         | 0.008              | 0.682                        | Correlation     | Log eGFR at baseline                             | n=24, native kidney only    |
| <i>SLC27A3</i> | 0.001          | 0.015              | -0.465                       | Correlation     | Log eGFR at baseline                             | n=44, native and transplant |
| <i>SLC27A3</i> | 0.002          | 0.036              | 0.476                        | DE              | eGFR, median value as threshold                  | n=23, native kidney only    |
| <i>TXNIP</i>   | 1.75E-05       | 0.004              | 0.806                        | DE              | Fibrosis, median value as threshold              | n=39, native and transplant |
| <i>TXNIP</i>   | 1.13E-05       | 0.002              | 0.974                        | DE              | Progression to kidney failure vs. no progression | n=44, native and transplant |
| <i>TXNIP</i>   | 0.0002         | 0.008              | -0.682                       | Correlation     | Log eGFR at baseline                             | n=24, native kidney only    |
| <i>TXNIP</i>   | 0.0009         | 0.025              | 0.717                        | DE              | Fibrosis, median value as threshold              | n=24, native kidney only    |

Abbreviations: Adj=adjusted (for age and sex), CRP=C reactive protein, DE=differential expression, eGFR=estimated glomerular filtration rate

Supplementary Table 7 Kidney gene expression correlations in American Indian T2D population with DKD (n=97)

| Gene           | Description                                                                                           | Correlation (Glomerular)      | Correlation (Tubular)        |
|----------------|-------------------------------------------------------------------------------------------------------|-------------------------------|------------------------------|
| <i>ANKRD12</i> | percentage of intact foot processes on both the peripheral and mesangial glomerular basement membrane | $r = 0.274$ ( $p = 0.026$ )   |                              |
| <i>ANKRD12</i> | percent of endothelial fenestration falling on the peripheral glomerular basement membrane            | $r = 0.285$ ( $p = 0.020$ )   |                              |
| <i>FKBP5</i>   | Albumin-creatinine ratio                                                                              | $r = -0.278$ ( $p = 0.023$ )  |                              |
| <i>GJA5</i>    | glomerular basement membrane width                                                                    | $r = -0.279$ ( $p = 0.023$ )  |                              |
| <i>GJA5</i>    | percent of endothelial fenestration falling on the peripheral glomerular basement membrane            | $r = 0.247$ ( $p = 0.046$ )   |                              |
| <i>GJA5</i>    | surface volume of peripheral glomerular basement membrane per glomerulus                              | $r = 0.282$ ( $p = 0.022$ )   |                              |
| <i>GRK5</i>    | surface volume of peripheral glomerular basement membrane per glomerulus                              | $r = -0.284$ ( $p = 0.021$ )  |                              |
| <i>GRK5</i>    | glomerular filtration rate, slope                                                                     |                               | $r = -0.451$ ( $p = 0.001$ ) |
| <i>INPP4B</i>  | glomerular filtration rate, slope                                                                     | $r = -0.330$ ( $p = 0.006$ )  |                              |
| <i>INPP4B</i>  | volume fraction of podocyte cell per glomerulus                                                       | $r = -0.321$ ( $p = 0.009$ )  |                              |
| <i>INPP4B</i>  | numerical density of podocyte cell per glomerulus                                                     | $r = -0.239$ ( $p = 0.053$ )  |                              |
| <i>INPP4B</i>  | Albumin-creatinine ratio                                                                              |                               | $r = 0.353$ ( $p = 0.015$ )  |
| <i>IRF2</i>    | glomerular filtration rate slope                                                                      |                               | $r = -0.355$ ( $p = 0.014$ ) |
| <i>MBNL1</i>   | numerical density of podocyte cell per glomerulus                                                     | $r = -0.339$ ( $p = 0.005$ )  |                              |
| <i>NAV2</i>    | glomerular basement membrane width                                                                    | $r = 0.289$ ( $p = 0.019$ ),  |                              |
| <i>NAV2</i>    | surface volume of peripheral glomerular basement membrane per glomerulus                              | $r = -0.277$ ( $p = 0.024$ )  |                              |
| <i>PIP5K1C</i> | percent of endothelial fenestration falling on the peripheral glomerular basement membrane            | $r = -0.240$ ( $p = 0.052$ ), |                              |
| <i>PIP5K1C</i> | mesangial fractional volume                                                                           | $r = 0.290$ ( $p = 0.018$ )   |                              |
| <i>PTBP3</i>   | foot process width in peripheral glomerular basement membrane                                         | $r = -0.309$ ( $p = 0.011$ )  |                              |
| <i>REV1</i>    | glomerular filtration rate Slope                                                                      | $r = 0.326$ ( $p = 0.007$ )   |                              |
| <i>REV1</i>    | Haemoglobin A1c                                                                                       |                               | $r = -0.296$ ( $p = 0.043$ ) |
| <i>SLC1A5</i>  | percent of endothelial fenestration falling on the peripheral glomerular basement membrane            | $r = -0.296$ ( $p = 0.016$ )  |                              |
| <i>SLC1A5</i>  | Age                                                                                                   |                               | $r = -0.328$ ( $p = 0.025$ ) |
| <i>SLC27A3</i> | glomerular filtration rate, slope                                                                     | $r = -0.308$ ( $p = 0.011$ )  |                              |
| <i>SLC27A3</i> | numerical density of podocyte cell per glomerulus                                                     | $r = -0.294$ ( $p = 0.017$ )  |                              |
| <i>SLC27A3</i> | Albumin-creatinine ratio                                                                              |                               | $r = 0.293$ ( $p = 0.046$ )  |
| <i>STAB2</i>   | glomerular filtration rate                                                                            |                               | $r = -0.394$ ( $p = 0.006$ ) |
| <i>TAB2</i>    | percent of endothelial fenestration falling on the peripheral glomerular basement membrane            | $r = 0.265$ ( $p = 0.031$ )   |                              |
| <i>TAB2</i>    | glomerular filtration rate                                                                            |                               | $r = 0.288$ ( $p = 0.049$ )  |
| <i>TXNIP</i>   | percentage of intact foot processes on both the peripheral and mesangial glomerular basement membrane | $r = -0.284$ ( $p = 0.021$ ), |                              |
| <i>TXNIP</i>   | percent of endothelial fenestration falling on the peripheral glomerular basement membrane            | $r = 0.243$ ( $p = 0.049$ )   |                              |

Glomerular refers to glomerular kidney tissue and tubular to tubular kidney tissue. Abbreviations: DKD= Diabetic kidney disease, T2D=type 2 diabetes. Correlations are spearman correlations.



**Supplementary Table 8 Mendelian randomisation results for the association between methylation at DKD-associated CpGs and DKD**

| Gene           | Outcome | Exposure   | Method     | SNPs ( <i>n</i> ) | OR (95%CI)       | <i>p</i> | Heterogeneity <i>p</i> | Egger intercept | Intercept <i>p</i> |
|----------------|---------|------------|------------|-------------------|------------------|----------|------------------------|-----------------|--------------------|
| <i>ADPRHL1</i> | DKD     | cg10072464 | IVW        | 4                 | 1.10 (0.84-1.43) | 0.506    | 0.07                   | 0.06            | 0.56               |
| <i>FKBP5</i>   | DKD     | cg03546163 | IVW        | 2                 | 0.79 (0.50-1.26) | 0.329    |                        |                 |                    |
| <i>INPP4B</i>  | DKD     | cg18376497 | IVW        | 3                 | 1.10 (0.88-1.38) | 0.383    | 0.45                   | -0.08           | 0.45               |
| <i>PTBP3</i>   | DKD     | cg00008629 | Wald ratio | 1                 | 1.04 (0.61-1.78) | 0.891    |                        |                 |                    |
| <i>REV1</i>    | DKD     | cg23527387 | Wald ratio | 1                 | 0.74 (0.58-0.94) | 0.012    |                        |                 |                    |
| <i>TXNIP</i>   | DKD     | cg19693031 | Wald ratio | 1                 | 1.04 (0.89-1.22) | 0.623    |                        |                 |                    |
| <i>ZNF20</i>   | DKD     | cg17944885 | IVW        | 4                 | 1.00 (0.87-1.14) | 0.997    | 0.71                   | 0.02            | 0.67               |

IVW=inverse variance weighted regression, DKD =Diabetic kidney disease

**Supplementary Table 9 Differentially methylated genes derived from METAL analysis from three models**

| Gene                              | Location                  | Adjustment Model                       | <i>n</i> | Zscore | <i>p</i>  | Direction | <i>p</i> <sub>het</sub> | Sites ( <i>n</i> ) |
|-----------------------------------|---------------------------|----------------------------------------|----------|--------|-----------|-----------|-------------------------|--------------------|
| ENSG00000235575<br>(RP4-800F24.1) | 1:169279903-<br>169291717 | Minimal Model                          | 1290     | -6.096 | 1.09E-09  | --        | 0.18                    | 2                  |
| ENSG00000235575<br>(RP4-800F24.1) | 1:169279903-<br>169291717 | Minimal + Current Smoking Status Model | 1166     | -5.681 | 1.338E-08 | --        | 0.16                    | 2                  |
| ENSG00000268863<br>(AC135048.1)   | 16:30996808-<br>30997533  | Minimal Model                          | 1291     | -4.978 | 6.44E-07  | --        | 0.02                    | 1                  |
| ENSG00000268863<br>(AC135048.1)   | 16:30996808-<br>30997533  | Minimal + Current Smoking Status Model | 1166     | -4.702 | 2.57E-06  | --        | 0.03                    | 1                  |
| ENSG00000268863<br>(AC135048.1)   | 16:30996808-<br>30997533  | Maximal Model                          | 952      | -4.906 | 9.29E-07  | --        | 0.11                    | 1                  |

Results with  $p \leq 10^{-5}$  reported. The significance threshold for epigenome-wide significance:  $p \leq 1 \times 10^{-8}$ .

**Supplementary Table 10 Genetics of Nephropathy – an International Effort (GENIE) members**

| Institute                                                                                                                                                                                                          | Name                | Affiliations                                                                                                                                                                                                                                                                                                                |
|--------------------------------------------------------------------------------------------------------------------------------------------------------------------------------------------------------------------|---------------------|-----------------------------------------------------------------------------------------------------------------------------------------------------------------------------------------------------------------------------------------------------------------------------------------------------------------------------|
| <b>Broad Institute, Cambridge, MA USA.<br/>Massachusetts General Hospital, Boston, MA USA.<br/>Harvard Medical School, Boston, MA USA<br/>Boston Children's Hospital, Boston, MA, USA</b>                          |                     |                                                                                                                                                                                                                                                                                                                             |
|                                                                                                                                                                                                                    | Jose C Florez       | Programs in Metabolism and Medical & Population Genetics, Broad Institute, Cambridge, MA USA<br>Diabetes Unit and Center for Genomic Medicine, Massachusetts General Hospital, Boston, MA USA.<br>Department of Medicine, Harvard Medical School, Boston, MA USA.                                                           |
|                                                                                                                                                                                                                    | Joel N Hirschhorn   | Programs in Metabolism and Medical & Population Genetics, Broad Institute, Cambridge, MA USA.<br>Division of Endocrinology, Boston Children's Hospital, Boston, MA, USA<br>Department of Pediatrics and Genetics, Harvard Medical School, Boston, MA, USA                                                                   |
|                                                                                                                                                                                                                    | Joanne B Cole       | Department of Biomedical Informatics, University of Colorado School of Medicine.<br>Programs in Metabolism and Medical & Population Genetics, Broad Institute, Cambridge, MA USA.<br>Diabetes Unit and Center for Genomic Medicine, Massachusetts General Hospital, Boston, MA USA.                                         |
|                                                                                                                                                                                                                    | Raymond Kreienkamp  | Division of Endocrinology, Boston Children's Hospital, Boston, MA, USA<br>Diabetes Unit and Center for Genomic Medicine, Massachusetts General Hospital, Boston, MA USA.                                                                                                                                                    |
| <b>University Belfast, Belfast, UK</b>                                                                                                                                                                             |                     |                                                                                                                                                                                                                                                                                                                             |
|                                                                                                                                                                                                                    | Laura J Smyth       | Molecular Epidemiology Research Group, Centre for Public Health, Queen's University Belfast, Belfast, UK.                                                                                                                                                                                                                   |
|                                                                                                                                                                                                                    | Katie Kerr          | Molecular Epidemiology Research Group, Centre for Public Health, Queen's University Belfast, Belfast, UK.                                                                                                                                                                                                                   |
|                                                                                                                                                                                                                    | Jill Kilner         | Molecular Epidemiology Research Group, Centre for Public Health, Queen's University Belfast, Belfast, UK.                                                                                                                                                                                                                   |
|                                                                                                                                                                                                                    | Yogesh Gupta        | Molecular Epidemiology Research Group, Centre for Public Health, Queen's University Belfast, Belfast, UK.                                                                                                                                                                                                                   |
|                                                                                                                                                                                                                    | Claire Hill         | Molecular Epidemiology Research Group, Centre for Public Health, Queen's University Belfast, Belfast, UK.                                                                                                                                                                                                                   |
|                                                                                                                                                                                                                    | Christopher Wooster | Molecular Epidemiology Research Group, Centre for Public Health, Queen's University Belfast, Belfast, UK.                                                                                                                                                                                                                   |
|                                                                                                                                                                                                                    | Kerry Anderson      | Molecular Epidemiology Research Group, Centre for Public Health, Queen's University Belfast, Belfast, UK.                                                                                                                                                                                                                   |
|                                                                                                                                                                                                                    | Gareth J McKay      | Molecular Epidemiology Research Group, Centre for Public Health, Queen's University Belfast, Belfast, UK.                                                                                                                                                                                                                   |
|                                                                                                                                                                                                                    | Amy Jayne McKnight  | Molecular Epidemiology Research Group, Centre for Public Health, Queen's University Belfast, Belfast, UK.                                                                                                                                                                                                                   |
|                                                                                                                                                                                                                    | Alexander P Maxwell | Molecular Epidemiology Research Group, Centre for Public Health, Queen's University Belfast, Belfast, UK.<br>Regional Nephrology Unit, Belfast City Hospital, Belfast, Northern Ireland, UK.                                                                                                                                |
| <b>The FinnDiane Study Group<br/>Folkhälsan Research Center, Helsinki, Finland.<br/>University of Helsinki and Helsinki University Hospital, Helsinki, Finland.<br/>University of Helsinki, Helsinki, Finland.</b> |                     |                                                                                                                                                                                                                                                                                                                             |
|                                                                                                                                                                                                                    | Emma H Dahlström    | Folkhälsan Institute of Genetics, Folkhälsan Research Center, Helsinki, Finland.<br>Department of Nephrology, University of Helsinki and Helsinki University Hospital, Helsinki, Finland.<br>Research Program for Clinical and Molecular Metabolism, Faculty of Medicine, University of Helsinki, 00290, Helsinki, Finland. |
|                                                                                                                                                                                                                    | Anna Syreeni        | Folkhälsan Institute of Genetics, Folkhälsan Research Center, Helsinki, Finland.<br>Department of Nephrology, University of Helsinki and Helsinki University Hospital, Helsinki, Finland.                                                                                                                                   |

|                                                                                        |                    |                                                                                                                                                                                                                                                                                                                                                                                                                                    |
|----------------------------------------------------------------------------------------|--------------------|------------------------------------------------------------------------------------------------------------------------------------------------------------------------------------------------------------------------------------------------------------------------------------------------------------------------------------------------------------------------------------------------------------------------------------|
|                                                                                        |                    | Research Program for Clinical and Molecular Metabolism, Faculty of Medicine, University of Helsinki, 00290, Helsinki, Finland.                                                                                                                                                                                                                                                                                                     |
|                                                                                        | Erkka Valo         | Folkhälsan Institute of Genetics, Folkhälsan Research Center, Helsinki, Finland.<br>Department of Nephrology, University of Helsinki and Helsinki University Hospital, Helsinki, Finland.<br>Research Program for Clinical and Molecular Metabolism, Faculty of Medicine, University of Helsinki, 00290, Helsinki, Finland.                                                                                                        |
|                                                                                        | Carol Forsblom     | Folkhälsan Institute of Genetics, Folkhälsan Research Center, Helsinki, Finland.<br>Department of Nephrology, University of Helsinki and Helsinki University Hospital, Helsinki, Finland.<br>Research Program for Clinical and Molecular Metabolism, Faculty of Medicine, University of Helsinki, 00290, Helsinki, Finland.<br>Deceased.                                                                                           |
|                                                                                        | Niina Sandholm     | Folkhälsan Institute of Genetics, Folkhälsan Research Center, Helsinki, Finland.<br>Department of Nephrology, University of Helsinki and Helsinki University Hospital, Helsinki, Finland.<br>Research Program for Clinical and Molecular Metabolism, Faculty of Medicine, University of Helsinki, 00290, Helsinki, Finland.                                                                                                        |
|                                                                                        | Per-Henrik Groop   | Folkhälsan Institute of Genetics, Folkhälsan Research Center, Helsinki, Finland.<br>Department of Nephrology, University of Helsinki and Helsinki University Hospital, Helsinki, Finland.<br>Research Program for Clinical and Molecular Metabolism, Faculty of Medicine, University of Helsinki, 00290, Helsinki, Finland.<br>Department of Diabetes, Central Clinical School, Monash University, Melbourne, Victoria, Australia. |
| <b>University College Dublin, Dublin Ireland</b>                                       |                    |                                                                                                                                                                                                                                                                                                                                                                                                                                    |
|                                                                                        | Ross Doyle         | Diabetes Complications Research Centre, Conway Institute, School of Medicine, University College Dublin, Dublin Ireland.                                                                                                                                                                                                                                                                                                           |
|                                                                                        | Eoin Brennan       | Diabetes Complications Research Centre, Conway Institute, School of Medicine, University College Dublin, Dublin Ireland.                                                                                                                                                                                                                                                                                                           |
|                                                                                        | Darrell Andrews    | Diabetes Complications Research Centre, Conway Institute, School of Medicine, University College Dublin, Dublin Ireland.                                                                                                                                                                                                                                                                                                           |
|                                                                                        | Denise Sadlier     | Mater Misericordiae Hospital, Dublin, Ireland D07 K201.                                                                                                                                                                                                                                                                                                                                                                            |
|                                                                                        | Finian Martin      | Diabetes Complications Research Centre, Conway Institute, School of Medicine, University College Dublin, Dublin Ireland.                                                                                                                                                                                                                                                                                                           |
|                                                                                        | Catherine Godson   | Diabetes Complications Research Centre, Conway Institute, School of Medicine, University College Dublin, Dublin Ireland.                                                                                                                                                                                                                                                                                                           |
| <b>University of Michigan School of Medicine, Ann Arbor, MI, USA</b>                   |                    |                                                                                                                                                                                                                                                                                                                                                                                                                                    |
|                                                                                        | Viji Nair          | Department of Medicine-Nephrology, University of Michigan School of Medicine, Ann Arbor, MI 48109, USA.                                                                                                                                                                                                                                                                                                                            |
|                                                                                        | Damian Fermin      | Department of Pediatrics-Nephrology, University of Michigan School of Medicine, Ann Arbor, MI 48109, USA.                                                                                                                                                                                                                                                                                                                          |
|                                                                                        | Lalita Subramanian | Department of Medicine-Nephrology, University of Michigan School of Medicine, Ann Arbor, MI 48109, USA.                                                                                                                                                                                                                                                                                                                            |
|                                                                                        | Matthias Kretzler  | Department of Internal Medicine, University of Michigan, Ann Arbor, Michigan, USA.                                                                                                                                                                                                                                                                                                                                                 |
| <b>University of Pennsylvania, Perelman School of Medicine, Philadelphia, PA, USA.</b> |                    |                                                                                                                                                                                                                                                                                                                                                                                                                                    |
|                                                                                        | Hongbo Liu         | Renal, Electrolyte, and Hypertension Division, Department of Medicine, University of Pennsylvania, Perelman School of Medicine, Philadelphia, PA, USA.<br>Institute for Diabetes, Obesity, and Metabolism, University of Pennsylvania, Perelman School of Medicine, Philadelphia, PA, USA.<br>Department of Genetics, University of Pennsylvania, Perelman School of Medicine, Philadelphia, PA, USA                               |
|                                                                                        | Katalin Susztak    | Renal, Electrolyte, and Hypertension Division, Department of Medicine, University of Pennsylvania, Perelman School of Medicine, Philadelphia, PA, USA.<br>Institute for Diabetes, Obesity, and Metabolism, University of Pennsylvania, Perelman School of Medicine, Philadelphia, PA, USA.                                                                                                                                         |

|                                                              |              |                                                                                                                             |
|--------------------------------------------------------------|--------------|-----------------------------------------------------------------------------------------------------------------------------|
|                                                              |              | Department of Genetics, University of Pennsylvania, Perelman School of Medicine, Philadelphia, PA, USA                      |
| <b>University of California San Diego, La Jolla, CA, USA</b> |              |                                                                                                                             |
|                                                              | Rany M Salem | Herbert Wertheim School of Public Health and Human Longevity Science, University of California San Diego, La Jolla, CA, USA |

## Supplementary Figures

**Supplementary Figure 1 Representative concordance plots for a duplicate sample pair.**  
Average  $r^2$  for seven duplicates = **0.99**.

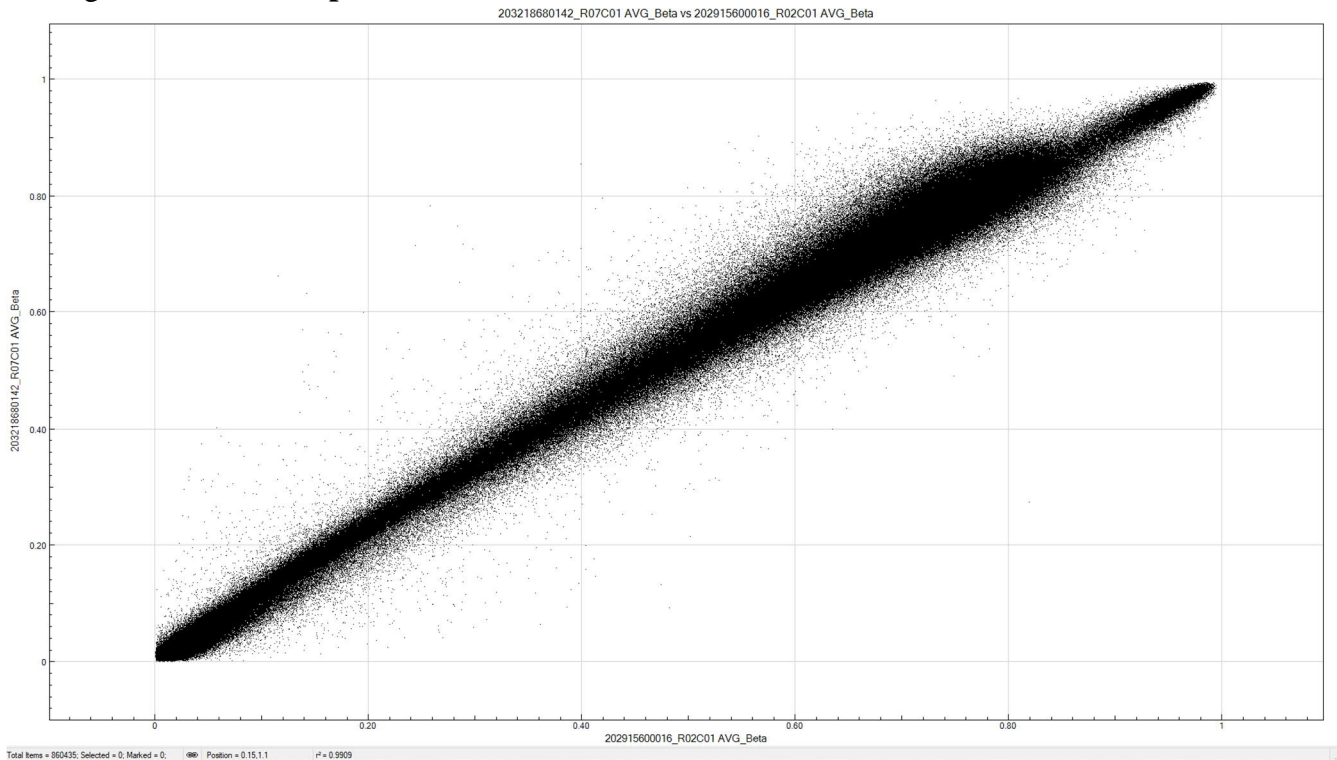

**Supplementary Figure 2 Flow chart depicting the methods undertaken**

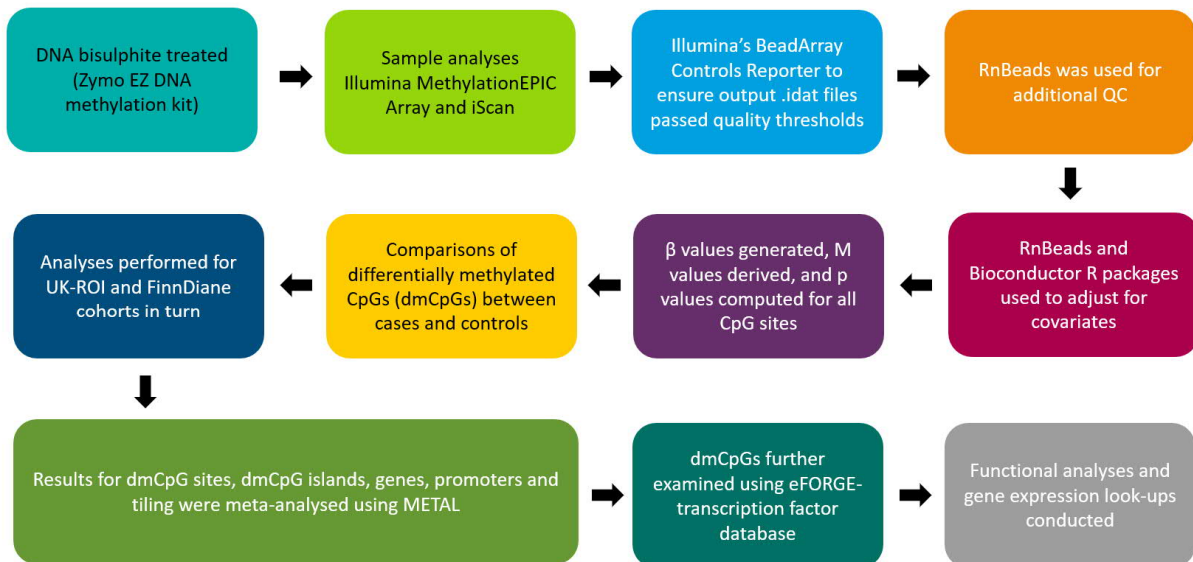

Abbreviations: DKD=Diabetic kidney disease, FinnDiane=Finnish Diabetic Nephropathy study, QC=Quality control, ROI=Republic of Ireland, UK=United Kingdom.

**Supplementary Figure 3 Regional association plots (A-G) for the seven CpGs EWAS-significant in each meta-analysis model.**

The regional plots included cg21961721 within *SLC27A3* (A), cg08150816 within *NME7* (B), cg05710777 within *LINC01800* (C), cg00008629 and cg15167811 within *PTBP3* (D) cg02711608 within *SLC1A5* (E) cg17944885 and

cg25544931 within a zinc finger gene region on chromosome 9 (F). Regional association plots were created using R package 'coMet' with gene track from Ensembl and CpG island and GWAS catalogue single nucleotide polymorphisms (SNPs) track from the UCSC. SNPs in red text have previously been associated with diabetic kidney disease. Circles represent CpGs and are coloured by their correlation (Spearman,  $r_s$ ) to the lead CpG in the region (black circle) as follows: white: no correlation ( $p > 0.05$ ), shades of red: positive correlations, shades of blue: negative correlations. Correlations calculated based on methylation levels in the FinnDiane dataset ( $n=798$ ). Association p-values were from the meta-analysis (minimal model adjusted for age, sex and six white blood cell counts), which combined FDR-adjusted p-values from the individual EWASs (in FinnDiane and UK-ROI). The p-values in the EWAS were computed from hierarchical linear models. EWAS significance was defined as  $p < 9.9 \times 10^{-8}$ .

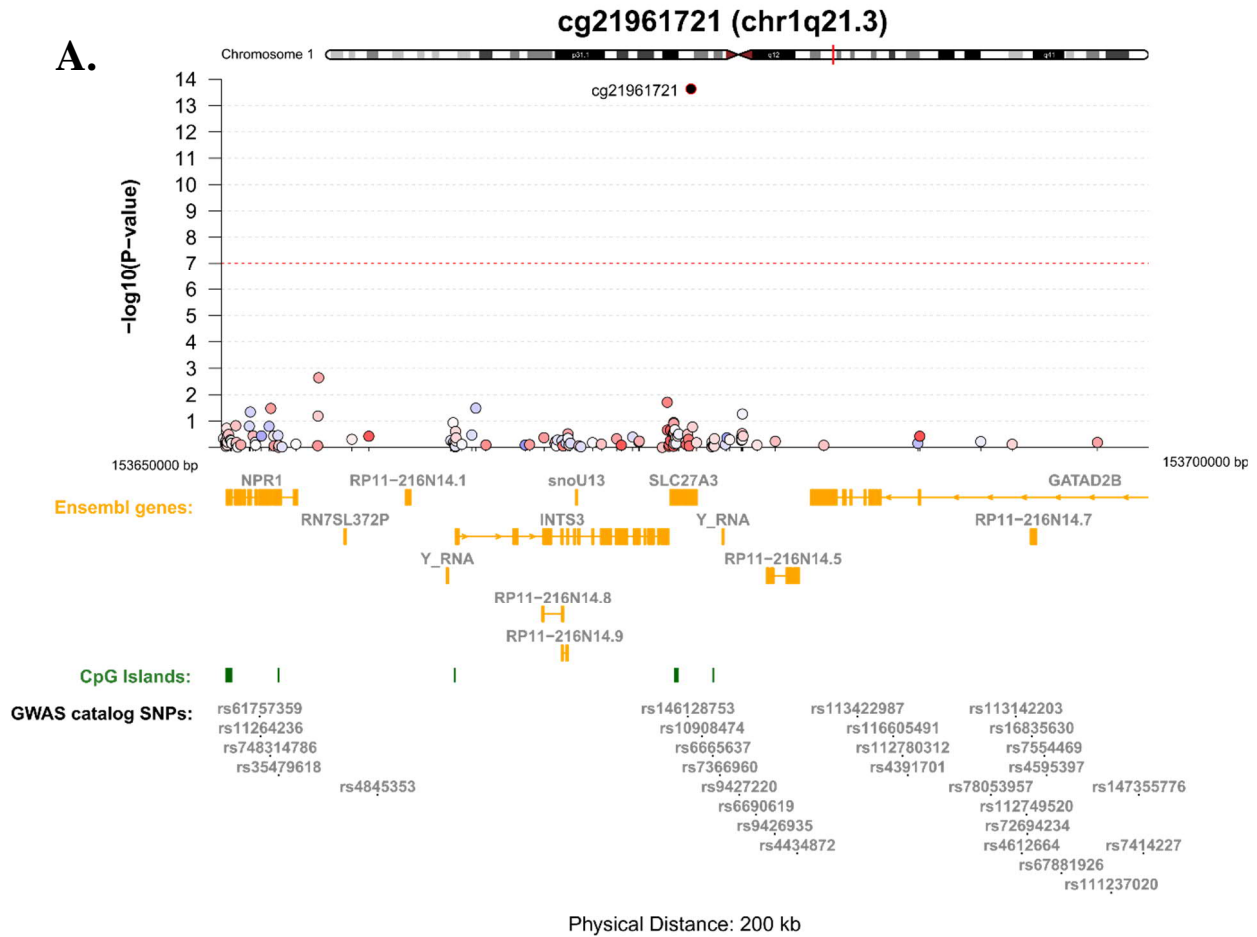

**B.**

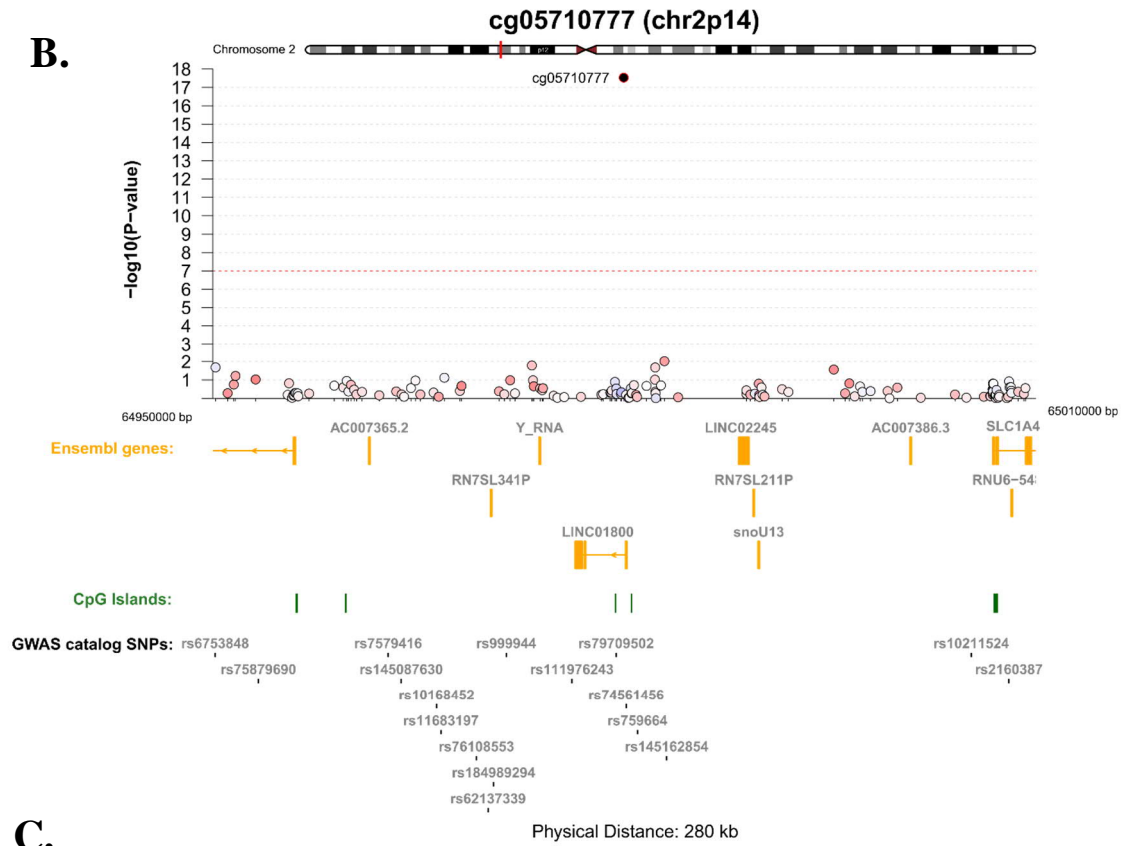

**C.**

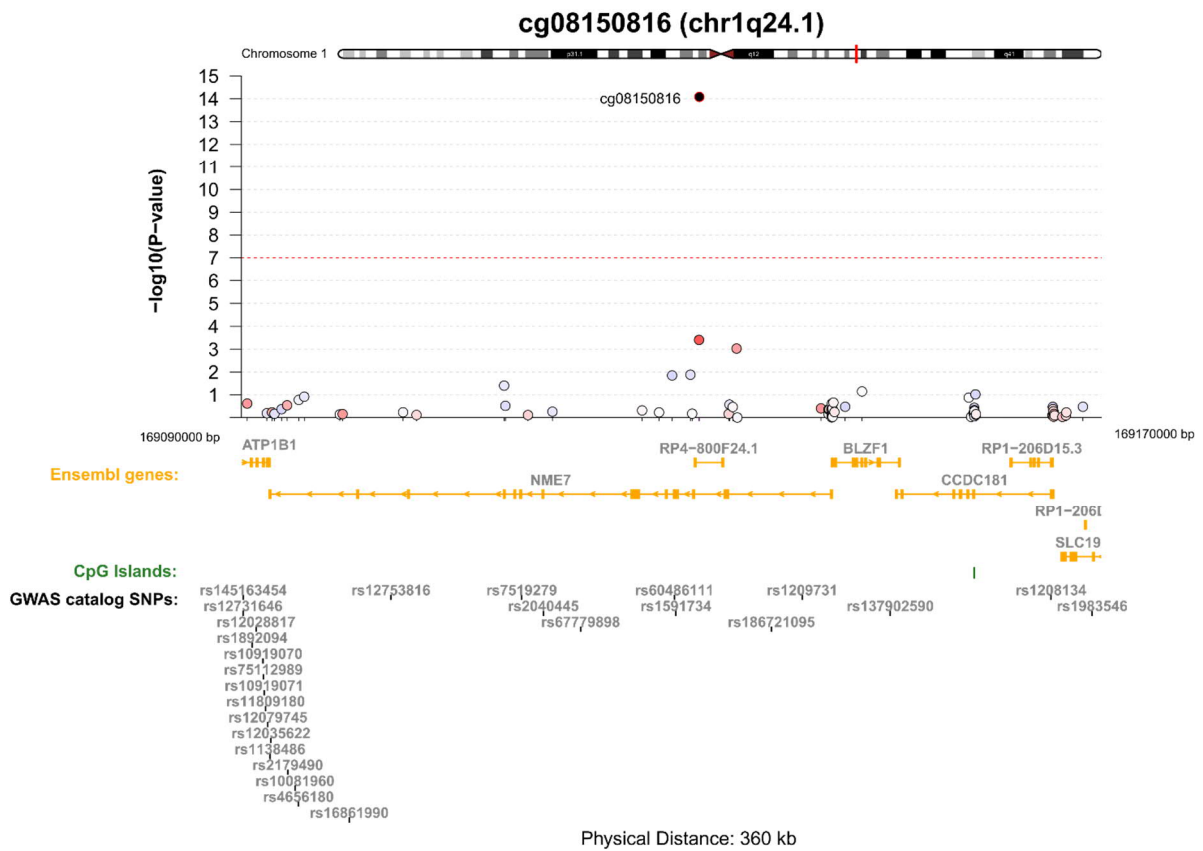

D.

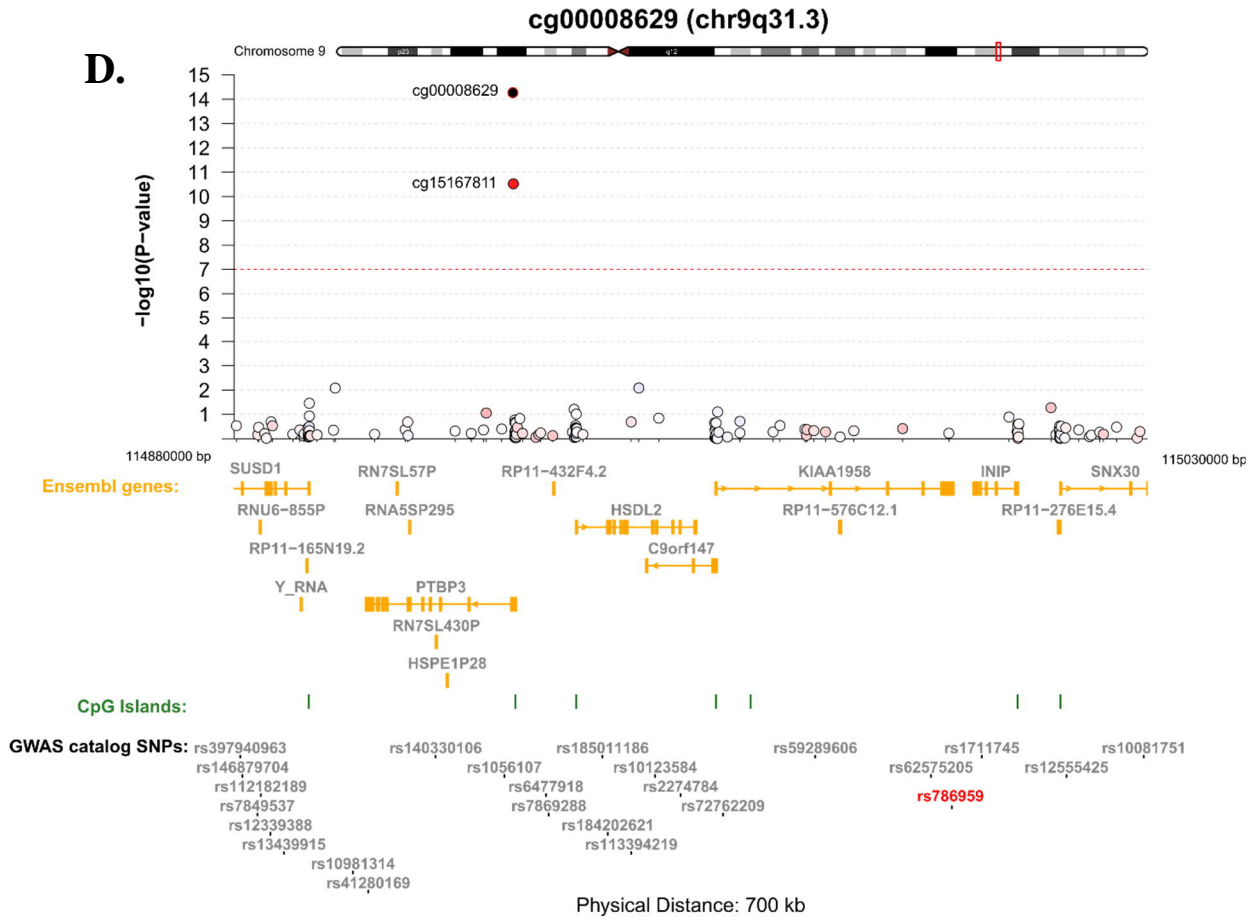

E.

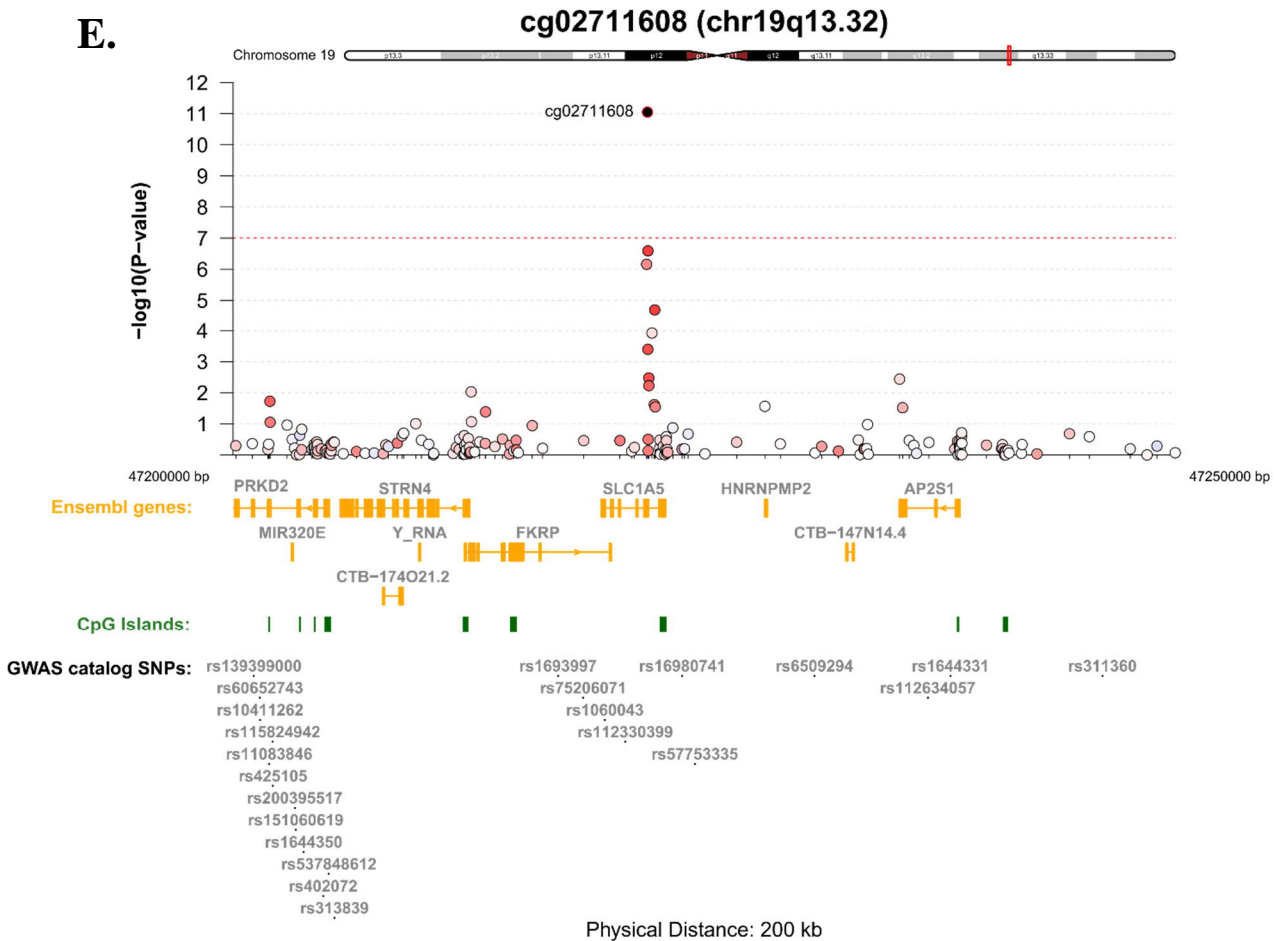



**F.**

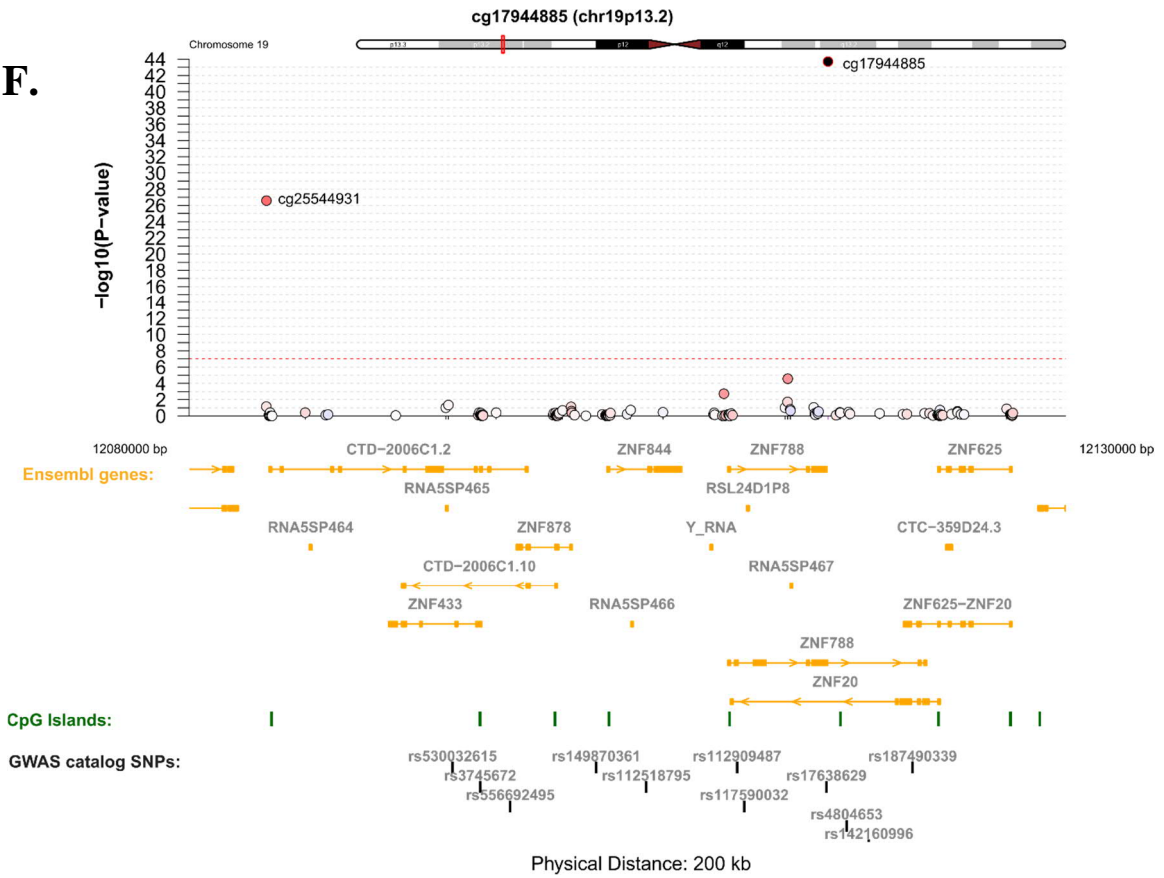

**Supplementary Figure 4 Regional association plots for the DKD-associated CpG located within the *REV1* gene**  
 Regional association plot was created using R package 'coMet' with gene track from ensembl and CpG island and GWAS catalogue single nucleotide polymorphisms (SNPs) track from the UCSC. SNPs in red text have previously been associated with diabetic kidney disease. Circles represent CpGs and are coloured by their correlation (Spearman,  $r_s$ ) to the lead CpG in the region (black circle) as follows: white: no correlation ( $p > 0.05$ ), shades of red: positive correlations, shades of blue: negative correlations. Correlations calculated based on methylation levels in the FinnDiane dataset ( $n=798$ ). Association  $p$ -values were from the meta-analysis (minimal model adjusted for age, sex and six white blood cell counts), which combined FDR-adjusted  $p$ -values from the individual EWASs (in FinnDiane and UK-ROI). The  $p$ -values in the EWAS were computed from hierarchical linear models.

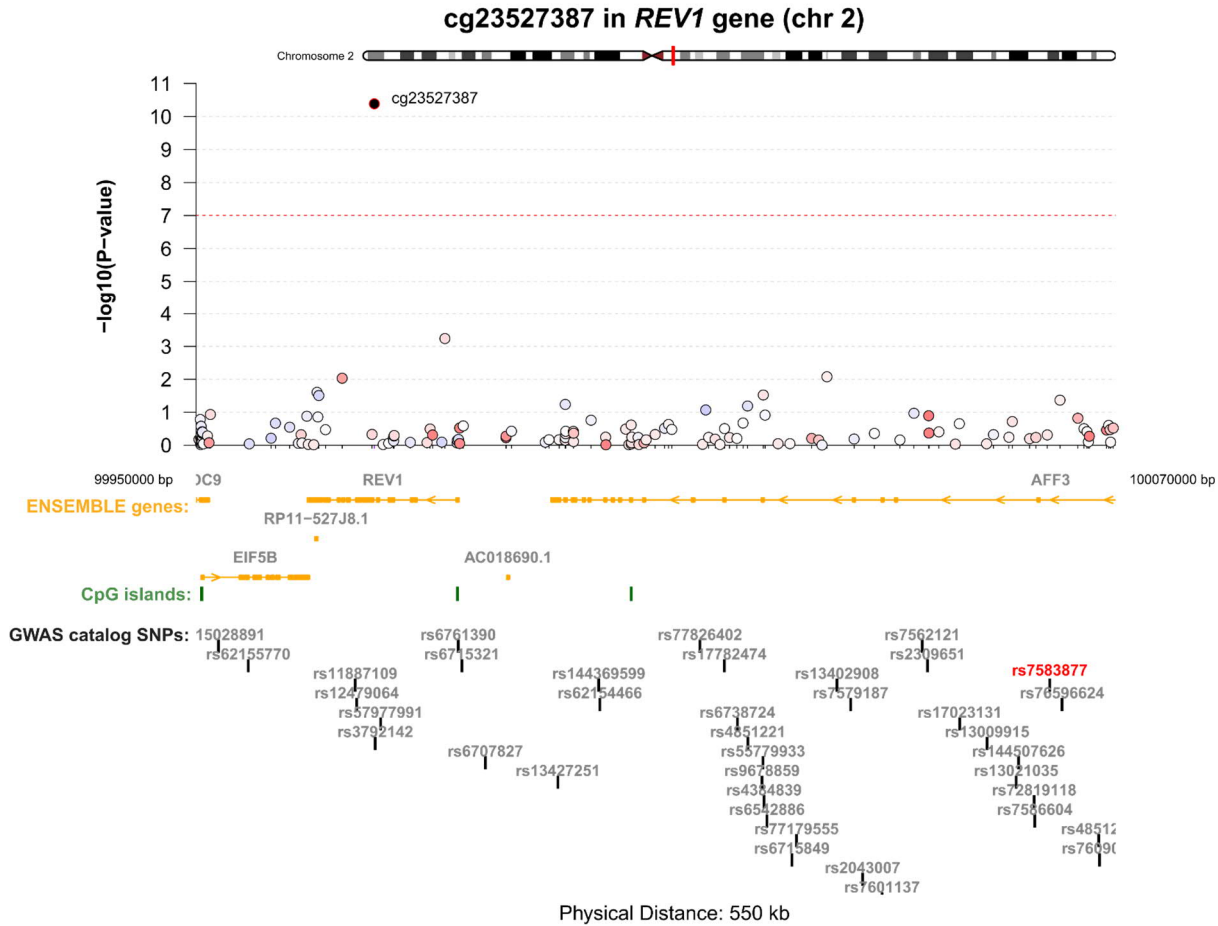

Supplement: 41467_2022_34963_MOESM1_ESM.pdf [file 41467_2022_34963_MOESM1_ESM.pdf]
