# Supplementary material for: Epigenome-wide meta-analysis identifies DNA methylation biomarkers associated with diabetic kidney disease
Source: PubMed Central journal article supplement (PMC9780337; doi:10.1038/s41467-022-34963-6), 2022-12-22
Supplement: 41467_2022_34963_MOESM3_ESM.pdf [file 41467_2022_34963_MOESM3_ESM.pdf]

## Description of Additional Supplementary Files

File Name: Supplementary Data 1

Description: Results for differentially methylated CpG sites reaching epigenome-wide significance in one of the three models

File Name: Supplementary Data 2

Description: Prospective analysis of DKD cases in the FinnDiane: CpGs methylation as a risk factor for the development of kidney failure

File Name: Supplementary Data 3

Description: Cis-expression quantitative methylation site(cis-eQTM) lookup for the 32 DKD-associated CpGs

File Name: Supplementary Data 4

Description: Lookups of previously published CpGs associated with DKD and related outcomes in diabetes

File Name: Supplementary Data 5

Description: Differentially methylated tilings ( $p \leq 10^{-5}$ ) from the three METAL analysis models

File Name: Supplementary Data 6

Description: Gene information for genes containing DKD-associated CpGs
